# Supplementary material for: A novel fluorescent chemosensor allows the assessment of intracellular total magnesium in small samples
Source: Royal Society of Chemistry journal article supplement (doi:10.1039/c3an01737k), 2013-12-17
Supplement: c3an01737k.xlsx [file c3an01737k.xlsx]

## Sheet: Foglio1
	AAS 5	DCHQ5	DELTA5			AAS 1	DCHQ1	DELTA1
1	22.78	19.75	3.03			22.78	25.64	-2.86		OUTPUT
2	20.7	22.93	-2.23			20.7	20.45	0.25
3	24.7	23.77	0.93			24.7	22.6	2.1		Regression Analysis										OUTPUT
4	23.94	24.31	-0.37			23.94	21.56	2.38		R multiple	0.987643
5	21.17	23.96	-2.79			21.17	26.62	-5.45		R-Squared	0.975439									Regression Analysis
6	11	9.8	1.2			26.13	24.23	1.9		Adjusted R-Squared	0.973995									R multiple	0.966818
7	9.76	12.4	-2.64			19.25	21.32	-2.07		Standard Error	1.832									R-Squared	0.934736
8	18.1	20.5	-2.4			17.09	17.48	-0.39		Observations	19									Adjusted R-Squared	0.930657
9	11.4	12.4	-1			20.31	21.29	-0.98												Standard Error	2.66146
10	23.125	25.0101	-1.8851			18	19.07	-1.07		VARIANCE ANALYSIS										Observations	18
11	59.375	61.8555	-2.4805			31.96	34.97	-3.01			gdl	SQ	MQ	F	Significance F
12	21.71	23.7733	-2.0633			35.81	34.13	1.68		Regression	1	2266	2266	675.164	4.00125e-15					VARIANCE ANALYSIS
13	30.75	32.8244	-2.0744			30.06	28.34	1.72		Residuals	17	57.0557	3.35622								gdl	SQ	MQ	F	Significance F
14	29.15	30.9267	-1.7767			20	21.7807	-1.7807		Total	18	2323.05								Regression	1	1623.21	1623.21	229.159	6.65984e-11
15	28.25	31.8731	-3.6231			10.81	14.1829	-3.3729				DCHQ5								Residuals	16	113.334	7.08336
16	28.875	29.4249	-0.5499			21.71	23.9932	-2.2832			Coefficients	Standard Error	Stat t	significance	Inferior 95%	Superior 95%				Total	17	1736.55
17	27.43	31.7801	-4.3501			23.125	17.6734	5.4516		Intercept	0.986593	1.01252	0.974397	0.343522	-1.14963	3.12282						DCHQ1
18	20	23.3925	-3.3925			59.375	59.6555	-0.2805		Slope	1.02652	0.039506	25.9839	4.00125e-15	0.943171	1.10987					Coefficients	Standard Error	Stat t	significance	Inferior 95%	Superior 95%
19	10.81	12.8391	-2.0291																	Intercept	1.82824	1.6712	1.09397	0.290166	-1.71455	5.37103
paired t-test	0.00110116					0.4821									1.10987					Slope	0.944414	0.062387	15.138	6.65984e-11	0.812159	1.07667
unpaired t-test	0.659866					0.896204								Slope	0.943171
mean			-1.60498					-0.448094						confidence interval 95%	0.166701										1.07667
																								Slope	0.812159
																								confidence interval 95%	0.264509
															3.12282
														Intercept	-1.14963
														confidence interval 95%	4.27244										5.37103
																								Intercept	-1.71455
																								confidence interval 95%	7.08558
